1 **Feedback control of neurogenesis by tissue packing**

2

3 Tom W. Hiscock<sup>1</sup>, Joel B. Miesfeld<sup>2</sup>, Kishore R. Mosaliganti<sup>1</sup>, Brian A. Link<sup>2</sup>,  
4 Sean G. Megason<sup>1</sup>.

5

6

7 <sup>1</sup>Department of Systems Biology, Harvard Medical School, Boston, MA, 02115.

8

9 <sup>2</sup>Department of Cell Biology, Neurobiology and Anatomy, Medical College of

10 Wisconsin, Milwaukee, WI 53226, USA.

11

12 **Abstract**

13 Balancing the rate of differentiation and proliferation in developing tissues is  
14 essential to produce organs of robust size and composition. Whilst many  
15 molecular regulators have been established, how these connect to physical and  
16 geometrical aspects of tissue architecture is poorly understood. Here, using high-  
17 resolution timelapse imaging, we find that dense tissue packing and complex cell  
18 geometries play a significant role in regulating differentiation rate in the zebrafish  
19 neural tube. Specifically, in regions of high cell density, progenitors are physically  
20 pushed away from the apical surface, which, in a Notch-dependent manner,  
21 leads to their differentiation. Using simulations we show that this naturally  
22 performs negative feedback control on cell number. Our results suggest a model  
23 whereby differentiation rate is carefully tuned to correct fluctuations in cell  
24 number, originating from variable cell cycle progression and inherently  
25 probabilistic differentiation programs.

26

## 27 **Introduction**

28

29 Growth is a central process in developmental programs, and its control is critical  
30 to generate tissues of a particular size. In many tissues, this growth is  
31 substantial. For example, cell number in the retina increases ~400-fold during its  
32 development (Alexiades and Cepko, 1996), but occurs with a highly stereotyped  
33 rate and duration to ensure that the final number of cells in the tissue is tightly  
34 controlled.

35

36 Tissue growth rate, here defined as the rate of increase in cell number within the  
37 tissue, affects two interlinked and essential processes of development: (1)  
38 proliferation of a pool of dividing progenitors, which increases progenitor number,  
39 and (2) differentiation of progenitors into post-mitotic differentiated cells, which  
40 reduces progenitor number (with progenitor apoptosis typically negligible). In  
41 homeostatic tissues, proliferation and differentiation must be perfectly balanced  
42 to maintain a constant pool of cycling cells. However, in developing tissues,  
43 proliferation and differentiation must instead be coordinated (Hardwick and  
44 Philpott, 2014; Hindley and Philpott, 2012; Kicheva et al., 2014), so that early,  
45 proliferation dominates and the tissue grows, whereas late, differentiation  
46 increases relative to proliferation and the growth rate finally approaches zero  
47 (Miguez, 2015). It is key to know how these two processes are tuned as  
48 development progresses in order to understand how a tissue reaches a specified  
49 final size. Furthermore, stereotyped tissue growth must occur despite large  
50 variability in proliferation rates (i.e. cell cycle times), and inherently probabilistic  
51 modes of differentiation (He et al., 2012). Determining how differentiation and  
52 proliferation are controlled – in the engineering sense of correcting errors – is  
53 thus fundamental to understanding how tissues reach a *robust* final size, despite  
54 the stochastic and noisy mechanisms underpinning their development.

55

56 Here, we focus on the neural tube as a model system of growth control, which  
57 shows stereotypic growth dynamics - specifically an initial phase of rapid  
58 proliferation, followed by a gradual shift to differentiation (Saade et al., 2013)  
59 Much is known about the molecular regulators of neural tube growth. For  
60 example, the *hes/her* transcription factors promote and maintain proliferation of  
61 the progenitor pool, whereas expression of genes such as neurogenin or p27  
62 induces cell cycle exit and differentiation (reviewed in (Hardwick et al., 2015)).  
63 Differentiation is also affected by the inheritance of specific protein domains  
64 following division (Alexandre et al., 2010; Dong et al., 2012; Huttner and Kosodo,  
65 2005; Noctor et al., 2004; Paolini et al., 2015). Expression and genetic analyses  
66 also implicate a number of extracellular regulators of cell fate. Some of these are  
67 local signals, such as the Delta-Notch pathway, whereas others, such as Wnt,  
68 TGFbeta, Shh and BMP, can act over a longer range (Dessaud et al., 2007;  
69 Garcia-Campmany and Marti, 2007; Le Dreau et al., 2014; Saade et al., 2013;  
70 Zechner et al., 2003). These then define molecular gradients that give rise to  
71 differential differentiation rates across the dorsal-ventral axis of the neural tube  
72 (Kicheva et al., 2014).

73

74 We wondered whether there are also mechanical, or physical, regulators of  
75 proliferation and/or differentiation during neural tube growth. Experiments on cell  
76 stretching *in vitro* reveal that proliferation can respond significantly to externally  
77 applied mechanical strain (Aragona et al., 2013; Benham-Pyle et al., 2015;  
78 Streichan et al., 2014). Furthermore, differentiation of various stem cells in  
79 culture has been shown to be highly dependent on the mechanical properties of  
80 their microenvironment (Arulmoli et al., 2015; Engler et al., 2006; Gilbert et al.,  
81 2010; Leipzig and Shoichet, 2009; Pan et al., 2016; Seidlits et al., 2010).  
82 However, the extent to which these observations apply to neural tube  
83 development is unclear, particularly since it has a much more complex tissue  
84 architecture than the 2D cell monolayers that have been studied previously. This  
85 tissue architecture is: (1) epithelial, and therefore has a distinct apical-basal

86 polarity; (2) pseudostratified, in which multiple nuclei are densely packed at  
87 different depths within a single epithelial layer; and (3) highly dynamic, with apical  
88 mitoses driving extensive rearrangement of nuclei, termed “interkinetic nuclear  
89 migration” (Leung et al., 2011; Norden et al., 2009). To what extent these  
90 properties impact differentiation in this tissue is unknown.

91

92 Here we uncover a significant role for the physical and geometric aspect of tissue  
93 packing during neural tube development. Using high resolution *in toto* timelapse  
94 imaging (Megason, 2009), we show that crowding at the apical surface leads to  
95 an increased rate of differentiation within the tissue. At the single cell level, this  
96 manifests itself as a correlation between cells whose nuclei have been displaced  
97 basally (due to apical crowding) and those that differentiate. We then show, using  
98 simulations, that such a feedback can naturally guide robust developmental  
99 trajectories in the face of probabilistic differentiation processes and highly  
100 variable cell cycle progression. Given the prevalence of similar pseudostratified  
101 tissue architectures, both in developmental contexts, (e.g. cortex (Kosodo et al.,  
102 2011), retina (Leung et al., 2011), pancreas (Bort et al., 2006)), as well as in  
103 homeostatic adult tissues (e.g. the intestine (Grosse et al., 2011; Jinguji and  
104 Ishikawa, 1992)), we speculate that tissue packing and apical crowding may be a  
105 widely-used regulator of differentiation and growth across a range of different  
106 organisms and tissues.

107

## 108 **Results**

109

### 110 **The neural tube is densely-packed and crowded at the apical surface**

111

112 To investigate neurogenesis in the zebrafish neural tube, we collected high  
113 resolution confocal stacks of embryos doubly transgenic for a ubiquitous  
114 membrane label *Tg(actb2:memCherry2)* (Xiong et al., 2014), and a pan-neuronal  
115 marker *Tg(neurod:eGFP)* (Obholzer et al., 2008), one of the earliest markers of

116 neural differentiation (Lee, 1997) (Fig. 1A, Fig. S1C). For measurement we  
117 define differentiation based on expression of *neurod* rather than cell cycle exit.  
118 Our tracking data suggests these are tightly correlated since we did not observe  
119 *neurod* in dividing cells (0/91).

120  
121 3D cell segmentations were generated using ACME (Mosaliganti et al., 2012)  
122 and revealed a densely-packed, pseudostratified epithelial tissue architecture  
123 (Fig. 1A). Consistent with other neuroepithelia, neurons are located basally,  
124 whereas progenitors are predominantly apical (Fig. 1B), although remain  
125 attached to both the apical and basal surface (Fig. 2A). However, there is a large  
126 variability in the distance of the progenitor nucleus (approximated by the cell  
127 segmentation centroid, Fig. S1) to the midline. This is typical of pseudostratified  
128 epithelia in which there are multiple nuclei at different distances to the midline  
129 within a densely packed single cell layer.

130  
131 We hypothesized that the variability in nuclear position was reflective of variability  
132 in progenitor number at different positions within the neural tube. Indeed we find  
133 that the density of progenitors (per unit apical surface) varies across the tissue,  
134 as does the density of neurons. However, we see a clear correlation between  
135 progenitor density and nuclear position. Specifically, in regions where there are  
136 many progenitors per unit apical surface, their mean distance to the midline is  
137 higher (Fig. 1C). This follows from a purely geometric argument: more  
138 progenitors produces crowding at the apical surface, thereby forcing some  
139 progenitor nuclei to be displaced basally. In this way, there is a direct geometrical  
140 connection between epithelial cell density and the distribution of nuclear depths  
141 due to cell packing.

142  
143 Next, we collected *in toto* timelapse imaging datasets that allowed single cell  
144 tracking of neural progenitors over ~12hrs of development starting from 24hpf  
145 (Xiong et al., 2013). These data revealed the highly dynamic aspect of tissue

146 architecture, as evidenced by the significant movement seen in tracking single  
147 nuclei over time (Fig. 1F). By following individual progenitors, we see substantial,  
148 but largely undirected movement between divisions. As progenitors differentiate,  
149 they move basally (Fig. 1D), and as they divide, they move apically (Fig. 1E). A  
150 consequence of this is that the surrounding cells are significantly deformed,  
151 moving their nuclei away from the apical surface (Fig. 1G). Therefore, similar to  
152 the retina, an increase in pressure at the apical surface caused by mitotic cells  
153 drive substantial movement of nuclei within the tissue (known as interkinetic  
154 nuclear migration) (Leung et al., 2011).

155

### 156 **Progenitors far from the apical surface differentiate**

157

158 Next, we used the timelapse data as a sensitive, single cell assay to measure  
159 differentiation rates, by directly tracking progenitors and assigning them to a  
160 neural identity based on *neurod:eGFP* expression. To avoid biases caused by  
161 variations along the DV axis, we restricted analysis to cells located within the  
162 central ~30% of the neural tube. By collecting many such tracks, we could  
163 generate Kaplan Meier plots (commonly known as ‘survival curves’ in the medical  
164 literature), as shown in Fig. 2C that characterize the rate at which progenitors  
165 differentiate (Rich et al., 2010). Kaplan-Meier curves are insensitive to  
166 incomplete cell tracks, avoids effects of cells moving out of frame, or the  
167 timelapse ending before a cell has definitively divided or differentiated.

168

169 Unexpectedly, we saw a correlation between the differentiation of progenitors  
170 and their geometry. To quantify this, we analyzed the shapes of progenitors prior  
171 to their division. Restricting our shape measurements to the pre-mitotic mother  
172 cell was key in order to say something about causation, since it is known that  
173 progenitors undergo stereotyped cell shape changes as they differentiate, which  
174 would result in a trivial correlation between cell shape and differentiation. As a  
175 simple measure of cell shape, we measured the maximum distance of the cell

176 nucleus to the apical surface observed in a time window 45-60 minutes prior to  
177 mitosis (Fig. 2A). We explicitly ignored any transient basal movement induced by  
178 neighboring cells as they divided, as we hypothesized that the long-term cell  
179 shape would be more informative (in Fig. S2, we confirm that the transient  
180 displacements have minimal effects on differentiation).

181

182 We then asked if this pre-mitotic shape correlated with *neurod* expression  
183 dynamics in the daughter cells. Strikingly, we found a strong association between  
184 the cells whose nuclei were far from the apical surface, and the cells that rapidly  
185 turned on *neurod* after dividing (Fig. 2B). By fitting a simple parametric form to  
186 the Kaplan Meier differentiation curves (Fig. 2C,D), we could quantify how the  
187 differentiation rate,  $R$ , depended on distance of nucleus to the midline,  $d$ , and  
188 found a significant positive correlation between the two (Fig. 2E). Interestingly, a  
189 similar observation has been made in the vertebrate retina (Baye and Link,  
190 2007), suggesting that this could be a rather general feature of neuroepithelia.

191

192 Together with the observations of tissue packing in Fig. 1, this suggests a model  
193 whereby apical crowding induces differentiation. More specifically, apical  
194 pressure – a result of a high density of cells at the apical surface – causes  
195 progenitors to be displaced away from the apical surface, which in turn leads to  
196 an increase in differentiation rate. Conversely, in regions of low apical pressure  
197 (i.e. few cells), we would expect a lower rate of differentiation.

198

### 199 **Pushing progenitor nuclei away from the apical surface by an arrested** 200 **mitotic cell promotes differentiation**

201

202 To test this hypothesis, we aimed to locally increase crowding at the apical  
203 surface and thereby push progenitors away from the midline. To do this, we  
204 exploited the fact that mitotic cells significantly deform their neighbors, a result of  
205 their large size and rounded morphology at the apical surface upon division (Fig.



206 1G). Therefore we could mimic an increase in crowding at the apical surface  
207 simply using a mitotic cell that is prevented from dividing. To achieve this, we  
208 arrested a small fraction of cells in mitosis, by inducing expression of a dominant  
209 negative version of PLK1, a kinase necessary for mitotic exit (Strzyz et al., 2015).  
210 Following heatshock-induced mosaic dnPLK1 expression, the small fraction of  
211 cells that were expressing the construct (BFP positive) failed to exit mitosis and  
212 remained rounded and apical for extended periods of time (Fig. 3A). Further,  
213 these arrested mitotic cells substantially deformed the shapes of neighboring  
214 progenitors and, as hoped, caused a significant increase in the distance of cell  
215 nuclei to the apical surface (Fig. 3B). We then measured whether such a  
216 perturbation to apical crowding and cell shape impacted the proliferation and/or  
217 differentiation of these cells.

218

219 We used two separate methods to assay differentiation rates. First, we collected  
220 high-resolution confocal stacks to count neuron and progenitor numbers following  
221 prolonged deformation by arrested mitotic cells. We found that there was a  
222 significant increase in the number of neurons in close proximity to an arrested  
223 cell, compared to unperturbed control regions from the same embryo, indicating  
224 an increase in the differentiation rate (Fig. 3C). We then measured proliferation  
225 rates by counting precursors at two time points, and subtracting to get the  
226 number of division events (Fig S3B). No significant difference was found in  
227 proliferation rate between regions deformed by an arrested cell and unperturbed  
228 regions (Fig. 3C). Together, this suggests that crowding progenitor nuclei away  
229 from the apical surface leads to an increase in differentiation, but minimal  
230 changes to proliferation, consistent with our previous results.

231

232 Secondly, we generated *in toto* timelapse datasets of these perturbed embryos  
233 and tracked cells that were in close proximity to the mitotically-arrested cells (but  
234 were themselves not arrested i.e. BFP negative). Tracking data revealed that  
235 progenitors adjacent to the arrested mitotic cell more rapidly and extensively

236 turned on *neurod* expression than in control embryos (Fig. 3D). Furthermore,  
237 within this dataset, we saw the same correlation between pre-mitotic cell shape  
238 and its daughter's *neurod* dynamics as above i.e. those progenitors that were  
239 pushed far from the apical surface by the arrested cell were exactly those that  
240 rapidly turned on *neurod* following division (Fig. 3E).

241

### 242 **The effect of the apical arrested mitotic cell is primarily physical**

243

244 The strong correlation between cell shape and differentiation rate in response to  
245 neighboring mitotic cells suggests that the effect of the arrested cell on its  
246 neighbors depends on its ability to physically deform them. However it is  
247 conceivable that a non-physical mechanism such as expression of some  
248 secreted molecule or cell surface protein by mitotic cells could also affect  
249 differentiation rate in neighbors. To test this possibility, we sought to arrest  
250 mitotic cells in a way that they did not increase pressure at the apical surface and  
251 so does not deform their neighbors to the same extent. Inspired by previous  
252 studies on neuroepithelial nuclear migration, we co-expressed p50 in the  
253 dnPLK1-arrested cells, which is known to inhibit the dynactin complex and thus  
254 impair apical movement of nuclei (Burkhardt et al., 1997; Tsuda et al., 2010;  
255 Tsujikawa et al., 2007). Indeed, we found a small number of progenitors that  
256 were arrested in mitosis (assayed by condensed chromosomes, Fig. 4A), but  
257 were non-apical and therefore did not push neighboring cell nuclei away from the  
258 apical surface (Fig. 4B). By tracking cells adjacent to these basal arrested cells,  
259 we no longer observed a local increase in differentiation, suggesting that the  
260 apical location of the mitotic cell is necessary for its neurogenic effect (Fig. 4C).  
261 These results suggest that the extent of crowding at the apical surface, as  
262 parameterized by nuclear position, strongly influences the differentiation rate of  
263 neural progenitors.

264

### 265 **Notch as a candidate molecular transducer of apical crowding**

266

267 Next, we aimed to understand how apical crowding and cell shape could be  
268 sensed molecularly, and therefore how the physical effect of tissue packing  
269 connects to the molecular circuitry upstream of neural differentiation. We started  
270 by considering the Notch pathway (Bray, 2016) whose activity is necessary for  
271 progenitor maintenance in the zebrafish neural tube. This pathway is particularly  
272 appealing since previous studies in the retina have suggested that Notch activity  
273 can depend on nuclear positioning via an apical-basal gradient of ligand and  
274 receptor (Aggarwal et al., 2016; Clark et al., 2012; Del Bene et al., 2008;  
275 Hatakeyama et al., 2014; Latasa et al., 2009).

276

277 To test whether Notch was involved in shape-sensing, we measured Notch  
278 activity in cells that were significantly and persistently deformed by an adjacent  
279 hsp:dnPLK1 arrested mitotic cell . We used a novel transgenic reporter to mark  
280 Notch activity, which drives destabilized GFP expression downstream of the *nort*  
281 promoter (Fig. S4A), a known direct target of Notch (Tsutsumi and Itoh, 2007).  
282 The transgene expressed fluorescence in a manner nearly identical to  
283 expression of the endogenous transcript, including robust expression in spinal  
284 cord neural progenitors (Fig. 5A, S4B). Importantly, abatement of Notch signaling  
285 by knockdown of Rbpj (Fig. S4C) or expression of dominant negative Maml (not  
286 shown), essential cofactors for transcriptional activity of all Notch subtypes  
287 resulted in nearly complete loss of reporter fluorescence. In addition, over-  
288 expression of Notch1 intracellular domain (NICD1) strongly enhanced reporter  
289 activity in either endogenous sites of *nort* expression or within ectopic locations  
290 that normally do not express *nort* (Fig. S4D).

291

292

293 We hypothesized that the arrested mitotic cells would locally inhibit Notch activity  
294 to drive differentiation. Consistent with this hypothesis, we saw a significant  
295 downregulation of Notch activity in progenitors adjacent to an arrested mitotic cell

296 (Fig. 5B). Given that Notch is required for progenitor maintenance in the neural  
297 tube (Appel et al., 2001; Huang et al., 2012; Schier et al., 1996; Yeo and Chitnis,  
298 2007), this supports a model whereby apical crowding inhibits Notch signaling,  
299 thus causing cells to differentiate. However, the extent to which Notch is  
300 sufficient to explain this phenomenon, and the mechanism by which the pathway  
301 responds to cell shape, is yet to be determined (see Discussion).

302

### 303 **Apical crowding provides a negative feedback on progenitor number**

304

305 Regardless of how it is transduced molecularly, the effect of tissue packing and  
306 apical crowding on differentiation rate would naturally provide a negative  
307 feedback between growth rate and cell number in this tissue, analogous to  
308 previous theoretical work on growth control in imaginal discs (Shraiman, 2005).  
309 Specifically, as the number of progenitors increases within the tissue, we expect  
310 an increase in the pressure and/or crowding of cells at the apical surface. This  
311 will then change the distribution of cell shapes within the tissue, giving rise to a  
312 higher number of basally located progenitors with smaller apical area, and thus a  
313 higher rate of differentiation. Therefore, as the number of progenitors within a  
314 region increases, their rate of differentiation also increases. This in turn leads to  
315 a depletion of the progenitor pool, giving rise to a negative feedback on  
316 progenitor cell number (Fig. 6A).

317

318 One possible role for this negative feedback would be to suppress fluctuations.  
319 Neurogenesis dynamics are far from deterministic, and must operate despite  
320 highly variable cell cycle lengths and multiple stochastic influences on the  
321 differentiation machinery (He et al., 2012). This generates significant variability in  
322 neuron and progenitor numbers across the tissue, and between different  
323 embryos. A crucial role for negative feedback would be to reduce this variability:  
324 intuitively, regions with too many progenitors would compensate by differentiating  
325 more; and regions with too few progenitors by differentiating less (see Fig. 6B).

326

327 To formally test this intuition, we constructed a mathematical model of neural  
328 tube development. We assume progenitors proliferate with a certain distribution  
329 of cell cycle times (Fig. 6C). Then, after dividing, there is a certain probability a  
330 given progenitor will either self renew ( $f_{PP}$ ), asymmetrically divide ( $f_{NP}$ ) or  
331 generate two post-mitotic daughters ( $f_{NN}$ ). Motivated by work in the chick neural  
332 tube (Saade et al., 2013), we assume that each daughter cell differentiates  
333 independently with probability  $f$  (i.e. division mode probabilities  $f_{PP} = f^2$ ,  $f_{NP} =$   
334  $2f(1 - f)$ ,  $f_{NN} = (1 - f)^2$  form a binomial distribution). Over time, we assume  
335 that this differentiation probability increases (i.e.  $f(t)$  is an increasing function of  
336 time,  $t$ ), so that initially the tissue grows, and later on differentiation dominates  
337 and the pool of precursors is depleted. We find that, without any feedback  
338 mechanism, the numbers of progenitors and neurons are highly variable in the *in*  
339 *silico* neural tube (Fig. 6D), a consequence of the probabilistic differentiation and  
340 variable cell cycle lengths. However, if we incorporate the feedback from apical  
341 crowding – whereby the differentiation probability,  $f(t, P)$ , increases not only as a  
342 function of time, but also as a function of progenitor number,  $P$  – then we find  
343 that this variability is significantly reduced, consistent with our intuition.

344

345

## 346 Discussion

347

348 In this study, using a combination of *in toto* timelapse imaging and physical  
349 perturbations, we have identified apical crowding as a novel regulatory  
350 mechanism for neurogenesis. In particular, we found that when neural  
351 progenitors are squeezed away from the midline (and/or compressed at their  
352 apical surface), they were more likely to differentiate. This suggests that  
353 neurogenesis dynamics within the neural tube are not entirely deterministic, nor  
354 cell-autonomously programmed, and instead can be regulated by the mechanical  
355 properties of the tissue, its environment and how these interact to regulate tissue

356 packing. Using modeling, we argued that this phenomenon results in negative  
357 feedback between progenitor number and differentiation rate, and that this can  
358 significantly reduce variability in developmental trajectories.

359

360 The negative feedback module also gives a mechanism to coordinate changes in  
361 tissue size and growth rate over developmental time. In particular, during early  
362 neural tube development, there are few progenitors and the tissue is relatively  
363 loosely packed, and thus in our model differentiation is rather low. However, as  
364 the neural tube continues to grow, it becomes compressed by the tissues  
365 surrounding it (likely the skin, somites and notochord, which each compress the  
366 neural tube from different directions), causing cells to be densely packed and so  
367 more likely to differentiate (see Fig. 6B). In this way, the exit from the early  
368 proliferative phase of neural tube growth could be governed by this mechanical  
369 feedback, in addition to known molecular regulators (Hudish et al., 2016), and  
370 therefore growth continues until all the available space is filled. This hypothesis  
371 may provide an explanation for the hyperproliferation phenotypes in human open  
372 neural tube defects (NTDs), such as spina bifida, in which the spinal cord is  
373 'open' or exposed at birth (Copp et al., 2013). We speculate that the increased  
374 growth is a result of the reduction in physical constraints acting on the neural  
375 tube. This has been directly observed in surgical models of NTDs, in which  
376 surgically removing the skin overlying the spinal cord results in increased  
377 proliferation in chick embryos (You et al., 1994). However, more experiments are  
378 required to determine to what extent such a space-filling mechanism is actually  
379 operating in the zebrafish neural tube, and its significance during unperturbed  
380 development.

381

382 In this work, we have largely focused on explaining our observations at the level  
383 of cells and tissues. Preliminary work has implicated the Delta-Notch signaling  
384 pathway as a potential mechanism by which cells measure their shape, although  
385 the precise details are far from clear. One hypothesis is that, given that Notch

386 ligand and receptor are both apically enriched, one might expect the level of  
387 active nuclear Notch (NICD) to depend on the distance of the nucleus to the  
388 apical surface, provided NICD is rapidly degraded (or bound by an inhibitor e.g.  
389 *numb*) en route to the nucleus (Aggarwal et al., 2016). In this case, having the  
390 nucleus in close proximity to the apical Notch receptors gives a higher chance  
391 that a given NICD molecule reaches the nucleus and activates transcription.

392

393 However, there are other possibilities. In particular, whilst we have focused on  
394 nuclear position as a readout of cell shape, there could also be a role for apical  
395 contact area. Correspondingly, another possible mechanism is that, as proposed  
396 elsewhere (Clark et al., 2012; Shaya et al., 2017), the amount of Notch signaling  
397 received by a cell is dependent on the size of its cell-cell contacts with  
398 neighboring cells (which is directly related to its apical area), since this is where  
399 the bulk of the Notch receptor is located. Therefore, a cell with smaller apical  
400 area will have a smaller contact with neighboring Delta positive cells and  
401 consequently will receive lower active Notch signaling. A further possibility is that  
402 it is not just geometry but also force that is at play. Notch signaling has been  
403 shown to depend, at the single molecular level, on forces and therefore the  
404 forces associated with apical compression, could be modulating Notch activity  
405 directly, rather than indirectly via its effect on cell geometry (Gordon et al., 2015).  
406 These possible mechanisms are not mutually exclusive and aspects of each may  
407 be coordinated to regulate neurogenesis. Testing these hypotheses will require  
408 higher resolution tools to measure and perturb Notch signal transduction.

409

410 Whilst in this work we have focused on Notch activity as a readout of cell shape,  
411 it is likely that other signaling pathways are involved. The WNT pathway is a  
412 promising candidate, since it is known to be responsive to mechanical cues  
413 (Brunet et al., 2013; Fernandez-Sanchez et al., 2015; Nowell et al., 2016) and  
414 has significant effects on neurogenesis (Zechner et al., 2003). Other  
415 mechanotransduction pathways such as the Hippo pathway (Dupont et al., 2011)

416 or the piezo proteins (Coste et al., 2012) could also be determining the response  
417 to increased pressure at the apical surface. Finally, it is possible that it is not just  
418 apical crowding, but also signals from the basal compartment (e.g. TGFbetas  
419 secreted by basally positioned neurons) that is important. Elucidating the  
420 molecular details of the shape-based feedback mechanism, and the interactions  
421 between Notch and other signaling pathways and the apical surface should be  
422 the subject of further work.

423

424

425 Finally, our work may yield important insights to understanding how  
426 differentiation and proliferation are balanced more generally. Many tissues have  
427 a similar architecture (i.e. densely packed, pseudostratified epithelia, with a large  
428 degree of nuclear movement), most notably other neuroepithelia, but also a  
429 range of other developmental and adult tissues (Spear and Erickson, 2012). It  
430 will be interesting to determine whether the feedback between tissue packing and  
431 differentiation described in this work is a common feature in these tissues, and to  
432 understand how its deregulation could lead to novel tissue architectures, such as  
433 the folded primate brain (Otani et al., 2016; Tallinen et al., 2014), or aberrant  
434 growth during tumorigenesis (Fernandez-Sanchez et al., 2015; Ou and Weaver,  
435 2015).

436

437



## 438 **Materials and Methods**

439

### 440 **Zebrafish strains and maintenance**

441

442 *Tg(neurod:eGFP)* (Obholzer et al., 2008), *Tg(actb2:mem-mCherry2)* (Xiong et  
443 al., 2014), *Tg(crystA  $\alpha$ :Gal4)* (Hayes et al., 2012) and *Tg(actb2:mem-citrine-*  
444 *citrine)* (Xiong et al., 2013) (referred to as “mem-citrine”) have been described  
445 previously. *Tg(actb2:h2b-mCherry2)* was generated using a plasmid that  
446 encodes the h2b sequence fused to mCherry2, in a pMTB backbone as  
447 described previously (Xiong et al., 2014). *Tg(-3.5kb nort:d2GFP)* was constructed  
448 using Gateway® recombination and the Tol2 Kit (Kwan et al., 2007) to place the  
449 3.5kb *nort* promoter upstream of d2GFP (destabilized GFP; Clontech). Natural  
450 spawning was used, and embryos were incubated at 28°C throughout their  
451 development (including during imaging), but excluding small amounts of time  
452 during experimental manipulation (such as microinjection, mounting) which  
453 occurred at room temperature.

454 Zebrafish work was approved by the Harvard Medical Area Standing Committee  
455 on Animals under protocol number 04487.

456

### 457 **Confocal imaging**

458 Embryos were anaesthetized in two different ways depending on the type of  
459 experiment. First, for continuous timelapse imaging, alpha bungarotoxin was  
460 delivered via microinjection into the heart an hour before imaging (4.6nl,  
461 0.5mg/ml); alternatively via mRNA microinjection at the single cell stage (2.3nl,  
462 15ng/ $\mu$ l). This method of anaesthetizing produces fewer developmental delays  
463 and defects than the conventional method, tricaine (Swinburne et al., 2015). For  
464 endpoint images, in which embryo health was less critical, we used tricaine  
465 (Sigma), at 0.2mg/ml.

466 Prior to imaging, healthy embryos were selected and dechorionated on a glass  
467 dish then transferred to a 1.5% agarose 0.4 $\mu$ m canyon mount (Megason, 2009).

468 Using a stereoscope, embryos were carefully positioned within the canyon by a  
469 hair loop, with the dorsal neural tube oriented upwards. For the majority of  
470 experiments, embryos were mounted in egg water, except some of the embryos  
471 for the results in Fig. 2, where they were mounted in 1% low melt agarose  
472 (A9414 SIGMA) for increased stability and longer-term imaging.  
473 A Corning coverslip #1 was placed on top of the agarose mount, taking care not  
474 to disturb the embryo positioning.  
475 Imaging was performed using a Zeiss 710 confocal microscope, C-Apochromat  
476 40X 1.2 NA objective, with a custom made heating chamber to keep the embryos  
477 at 28°C. The following laser lines were used: 405nm (eBFP2), 488nm (eGFP),  
478 514nm (citrine) and 594nm (mCherry2). Other parameters were optimized for  
479 each experiment (for example, low laser powers were used for all timelapse  
480 imaging to prevent bleaching), but were consistent between experimental  
481 conditions. Timelapse movies were started at 24hpf ( $\pm 1$ hr). Endpoint  
482 measurements (Fig. 3C and 5B) were taken at 32hpf.  
483 Figures are composed of single XY slices, dorsal view, of single timepoints from  
484 the timelapse data. Note that some images are flipped left to right for consistency  
485 of data presentation. The imaging from Fig. S4 was performed on a Nikon  
486 Eclipse E800 confocal microscope with the embryos anaesthetized in Tricaine  
487 (Sigma) and embedded in low melt agarose (1%) within glass bottomed petri  
488 dishes.

489

490

#### 491 **Analysis of timelapse data**

492 Raw Zeiss.lsm files were converted to formats compatible with GoFigure2, an  
493 open-source software package to manually analyze *in toto* timelapse imaging  
494 data. First, 3-4 cells were manually tracked for the entire length of the movie.  
495 These tracks were then used to register the data between timepoints, thus  
496 removing global translation and rotation of the embryo. Then, using this  
497 registered dataset, we assembled a set of tracks. We started each track at its

498 division (evident by its spherical morphology), and tracked both forwards and  
499 backwards in time. We restricted our tracks to cells within the central 30% of the  
500 neural tube along DV, and rejected cells that could not be tracked for long  
501 periods e.g. those that moved out of the field of view too quickly, or had poor  
502 membrane signal. GFP intensity (from *neurod:eGFP*) was used to identify  
503 neurons. To positively identify a neuron, we required that the entire cell was GFP  
504 positive, in each of the XY, XZ and YZ image planes, to avoid the potential of  
505 GFP scatter from neighboring cells giving false positives. The first time at which a  
506 cell was identified as a neuron was recorded. In some cases, GFP was excited  
507 intermittently throughout the timelapse to reduce bleaching (e.g. every hour,  
508 instead of every 3 minutes). In this case, the time recorded was chosen to be  
509 midway between the time intervals (e.g. if a cell was negative at 3hrs, but  
510 positive at 4hrs, we record 3.5hrs). Cells that did not turn on GFP were tracked  
511 either until they divided, or they were no longer trackable, and the total track time  
512 was recorded. GFP-on times ('events') were combined with the total track time to  
513 generate Kaplan-Meier plots (MATLAB). These are commonly used to analyze  
514 survival times in the medical community. For example, an 'event' could be  
515 recovery from a certain illness, and the Kaplan-Meier plots are used to compare  
516 recovery time between placebo and drug-treated subjects. They are particularly  
517 useful when not all subjects complete the entire study, termed 'censoring', as  
518 well as for analyzing *in toto* image tracks, which are of variable lengths.

519

520

### 521 **Manual image analysis**

522 Distances are measured within GoFigure2 using a 3D distance tool. The dorsal-  
523 ventral height is measured from the base of the floorplate to the top of the  
524 roofplate. The mediolateral width is measured at the point along DV where it is  
525 widest. The anterior-posterior segment length is found by measuring the AP  
526 distance between neurons that first project ventrally, which occur once per neural  
527 hemisegment. Cell (or nuclei) centroid positions are manually identified and

528 recorded by the placement of a cell mesh, and its distance to the apical surface  
529 is measured again using the 3D distance tool.  
530 Notch activity was measured by GFP intensity from the nort:dGFP reporter - GFP  
531 intensity was measured within a  $3\mu\text{m}$  radius spherical mesh, whose center was  
532 placed  $12\mu\text{m}$  away from the apical surface in line with the arrested mitotic cell  
533 (BFP positive). For control, two random numbers were chosen (MATLAB) to  
534 generate positions along the DV and AP axes, and a  $3\mu\text{m}$  mesh was placed  
535  $12\mu\text{m}$  away from this point.

536

### 537 **Automated image analysis: high quality single timepoint images**

538 Raw Zeiss .lsm files were first converted to .mha files. Segmentation was then  
539 performed on the membrane channel, using the ACME algorithm (Mosaliganti et  
540 al., 2012). A mask was created in GoFigure2 to correctly identify meshes that fell  
541 within the neural tube, and excluded skin, notochord and somite cells. Cell  
542 position, volume, shape and median GFP intensity were extracted from the cell  
543 meshes, and analyzed in MATLAB. Progenitor density was calculated by binning  
544 cells along the DV and AP axes into  $14\mu\text{m}$  bins and counting cell number within  
545 each bin. Segmentations and neuron classifications were visually inspected on  
546 ITKsnap and, where necessary, manually corrected. All image analysis was  
547 performed using custom C++ scripts.

548

### 549 **DNA constructs**

550 The hsp:mTagBFP2-dnPLK1 construct was generated by fusing the coding  
551 sequence for mTagBFP2 (gift from Pamela Silver) to a dominant negative human  
552 polo-kinase 1 (gift from Caren Norden (Strzyz et al., 2015)), using a flexible GA  
553 linker, and inserting into a vector containing the hsp70 promoter (Xiong et al.,  
554 2015). The hsp:mTagBFP2-dnPLK1-2A-p50 was similarly made, but with two  
555 extra pieces: the P2A sequence (gift from Tony Tsai, Addgene #52421) and the  
556 p50 (amplified from zebrafish cDNA). Pieces were amplified using PCR with 20-  
557 30bp overlap regions, and combined using isothermal assembly. RT-PCR was

558 performed to generate TOPO® (Life Technologies) plasmids of the full-length  
559 cDNA sequence for zebrafish *nort*. The TOPO® (Life Technologies) *nort* plasmid  
560 was used to generate an in situ primer. A list of primers is provided in Table S1.

561

### 562 **Fluorescent in situ hybridization**

563 Dechorionated embryos were fixed in fresh, ice cold 4% paraformaldehyde/PBS  
564 overnight at 4°C. After fixation embryos were washed twice in ice cold PBS and  
565 then four times in ice cold 100% MeOH and stored in MeOH (15-20 embryos per  
566 tube) at -20°C. Following methanol fixation embryos were re-hydrated in a  
567 dilution series of MeOH:1xPBS/1%Tween-20 (3:1,1:1,1:3) and then standard in  
568 situ methodology (Thisse and Thisse, 2004) was followed and Fast Red tablets  
569 (*F4648* Sigma) were used to visualize *nort* mRNA.

570

### 571 **Whole Mount Zebrafish Larvae Immunofluorescence**

572 Embryos were fixed in 4% paraformaldehyde in 1xPBS (pH 7.4) overnight at 4°C  
573 and after fixation rinsed 3 times for 5 minutes in 1xPBS. Prior to immunostaining,  
574 embryos were blocked for 60 minutes at room temperature in 2% normal goat  
575 serum/1%Triton X-100/1% Tween-20/1xPBS (pH 7.4) (blocking buffer). After  
576 block, embryos were incubated in diluted anti-Myc primary antibody (clone9E10,  
577 Thermofisher) at 1:200 dilution in blocking buffer overnight at room temperature.  
578 Embryos were then rinsed in 1% Tween-20/1xPBS (pH 7.4) and then washed 3  
579 times for 60 minutes in 1% Tween-20/1xPBS (pH 7.4). Then embryos were  
580 incubated in Alexa-567 secondary antibodies (Invitrogen) at 1:800 in blocking  
581 buffer overnight at 4°C. Following secondary treatment embryos were washed 4  
582 times for 30 minutes in 1% Tween-20/1xPBS

583

### 584 **Microinjections of DNA and mRNA**

585 Plasmid DNA (hsp:mTagBFP2-dnPLK1, hsp:mTagBFP2-dnPLK1-P2A-p50) was  
586 injected at the single cell stage, delivering 2.3nl (Nanoject) at a concentration of  
587 10ng/μl combined with 25ng/μl transposase mRNA. mRNA (mem-citrine-citrine)

588 was synthesized using the mMESSAGE mMACHINE kits (Ambion), and injected  
589 at the 16-128 cell stage for mosaic labeling at a concentration of 20ng/ $\mu$ l. Prior to  
590 each experiment, embryos were screened for health. 4.6nl of 10 ng/ $\mu$ l 5xUAS-  
591 *E1b:6xMYC-notch1a* (Scheer and Campos-Ortega, 1999) plasmid DNA was  
592 injected into 1-4 cell stage embryos.

593

#### 594 **Morpholinos (MO)**

595 *tp53* MO, 5'-GCGCCATTGCTTTGCAAGAATTG-3' (Robu et al., 2007). Injected  
596 9.2 nL of a 50  $\mu$  M MO concentration.

597

598 *rbpj* ATG MO 5' – CAAACTTCCCTGTCACAACAGGCGC – 3' (Ohata et al.,  
599 2011) Injected 9.2 nL of a 50  $\mu$  M MO concentration.

600

#### 601 **Heatshock treatment**

602 Embryos were placed in a 1.5ml Eppendorf tube containing (pre-warmed) egg  
603 water, at 37°C, for 45 minutes, between 19-20hpf. Embryos were then removed  
604 and placed in fresh (22-28°C) water, and returned to the incubator.

605

#### 606 **Statistical tests**

607 Statistical analysis of pairwise comparisons was mainly performed using a two-  
608 tailed t-test (ttest2 in MATLAB). Several variables had a highly skewed  
609 distribution (namely: (1) distance of cell to apical surface, and (2) nort:dGFP  
610 expression) and so in these cases we used a Mann-Whitney test (ranksum in  
611 MATLAB). Kaplan-Meier curves were analyzed using the log rank test (logrank in  
612 MATLAB) (Rich et al., 2010). For Figure 2C, we fit the Kaplan-Meier curves to a  
613 parametric form  $\rho(t) = 1 - \exp [R(t_r - t)]$  for the first 6 hours after division. Note  
614 that  $R$  can be related to the division probability in Figure 6, provided one knows  
615 when cells stop differentiating (e.g. when they enter S phase). The fitting was  
616 implemented as a linear fit of  $\ln(1 - \rho(t))$  in time. For the plot of  $R$  as a function  
617 of  $d$ ,  $R(d)$  corresponds to the differentiation rate for all cells whose nuclear  
618 distance exceeds the value  $d$ .

619

## 620 **Mathematical model**

621

622 A stochastic simulation was implemented in MATLAB. Each progenitor is  
623 modeled independently and after birth is assumed to divide again with a cell  
624 cycle time taken from the distribution in Fig. 6C (a generalized extreme value  
625 distribution (Bogdan et al., 2014)). Upon dividing, each daughter cell  
626 differentiates independently with probability  $f(t)$ . In our simulations,  $f(t)$   
627 increases linearly from zero to one over the course of 12 cell cycles. For Fig.  
628 6D,E, we repeat each simulation 3000 times and plot the mean, plus/minus the  
629 standard deviation as shown. For feedback, we modify  $f(t) \rightarrow f(t) + kP -$   
630  $\delta$ , where  $k$  is a constant controlling the strength of feedback, and  $\delta$  is a constant  
631 that is manually tuned such that the mean dynamics are similar to the case  
632 without feedback.

633

634 **Figure Legends**

635 **Figure 1: The neural tube is a densely packed and dynamic**  
 636 **pseudostratified epithelium.**

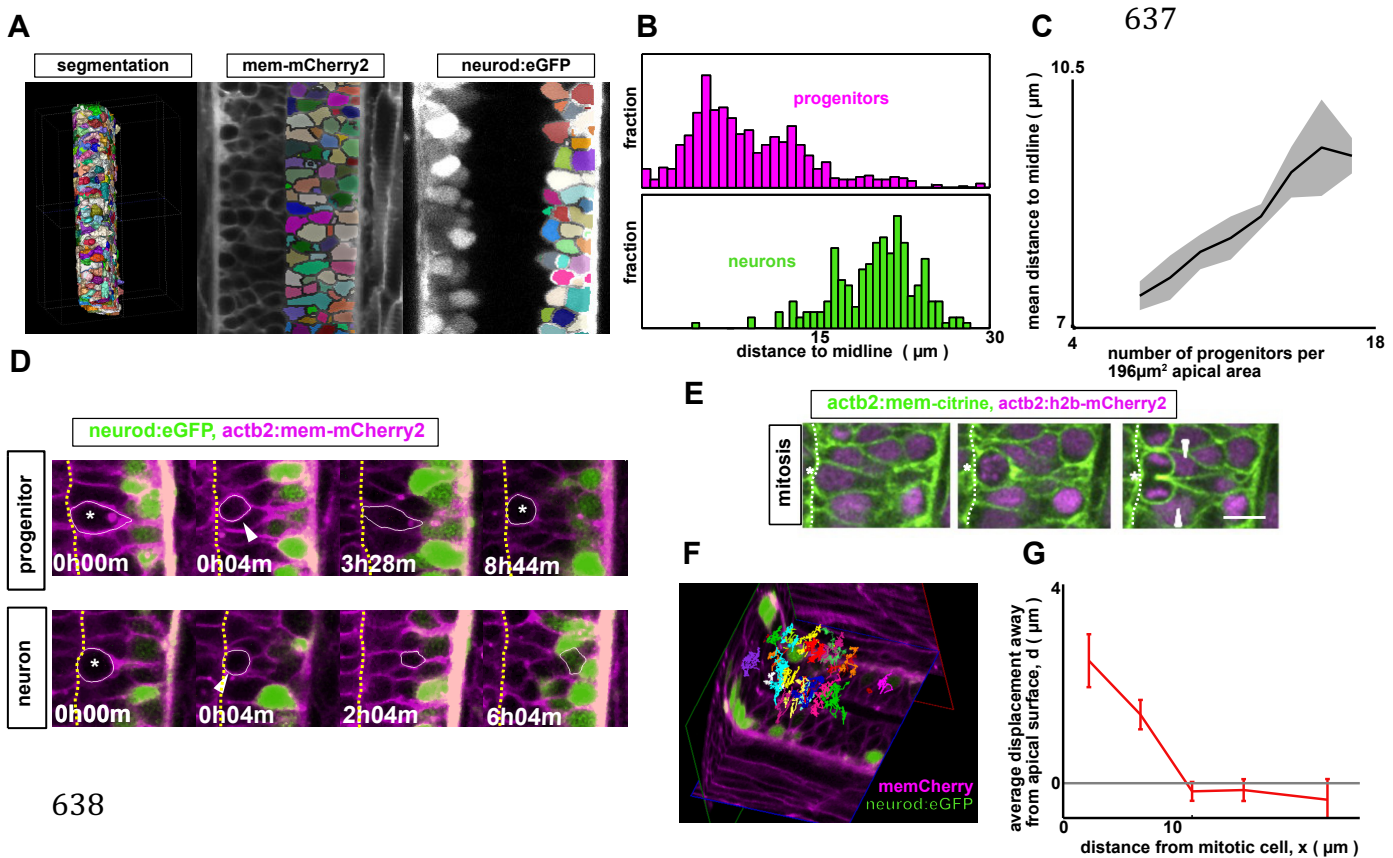

638

639

640 A: Analysis pipeline: membrane-labeled images are segmented and cropped  
 641 using custom scripts to generate 3D cell meshes for the entire neural tube. Each  
 642 mesh is then classified as a neuron or a progenitor, according to the expression  
 643 level of the neural marker (*neurod:eGFP*) (See also Fig. S1C).

644 B: Distance of cell centroid position to the midline, for both progenitors and  
 645 neurons.



646 C: Regions of high progenitor density correlate with regions where progenitors  
647 are located far from the midline (shown is mean distance plus/minus standard  
648 error).

649 D: Some representative cell tracks from GoFigure2. Upper: a cycling progenitor.  
650 Lower: a nascent neuron. Asterisks denote a mitotic cell; arrowheads denote one  
651 of the daughter cells from the mitotic cell.

652 E: Endogenous mitotic cells physically deform their neighbors, depicted in a  
653 montage of images separated by 9 minutes per frame. Asterisk denotes mitotic  
654 cell ending cytokinesis; arrowheads denote perturbed adjacent cells. (Scale bar:  
655  $10\mu\text{m}$ )

656 F: Cell tracking from high resolution, *in toto* timelapse movies is performed in  
657 GoFigure2, reveals extensive nuclear movement.

658 G: Mitotic cells transiently push their neighbors away from the apical surface. We  
659 measure the maximal basal displacement moved by a given cell as a result of a  
660 nearby division. We also record the distance  $x\ \mu\text{m}$  along the apical surface  
661 between the measured cell and the mitotic cell. We then group the data  
662 according to  $x$ , and plot the mean and standard error as shown.

663

664 **Figure 2: Progenitors that are far from the apical surface differentiate more**  
 665 **frequently**

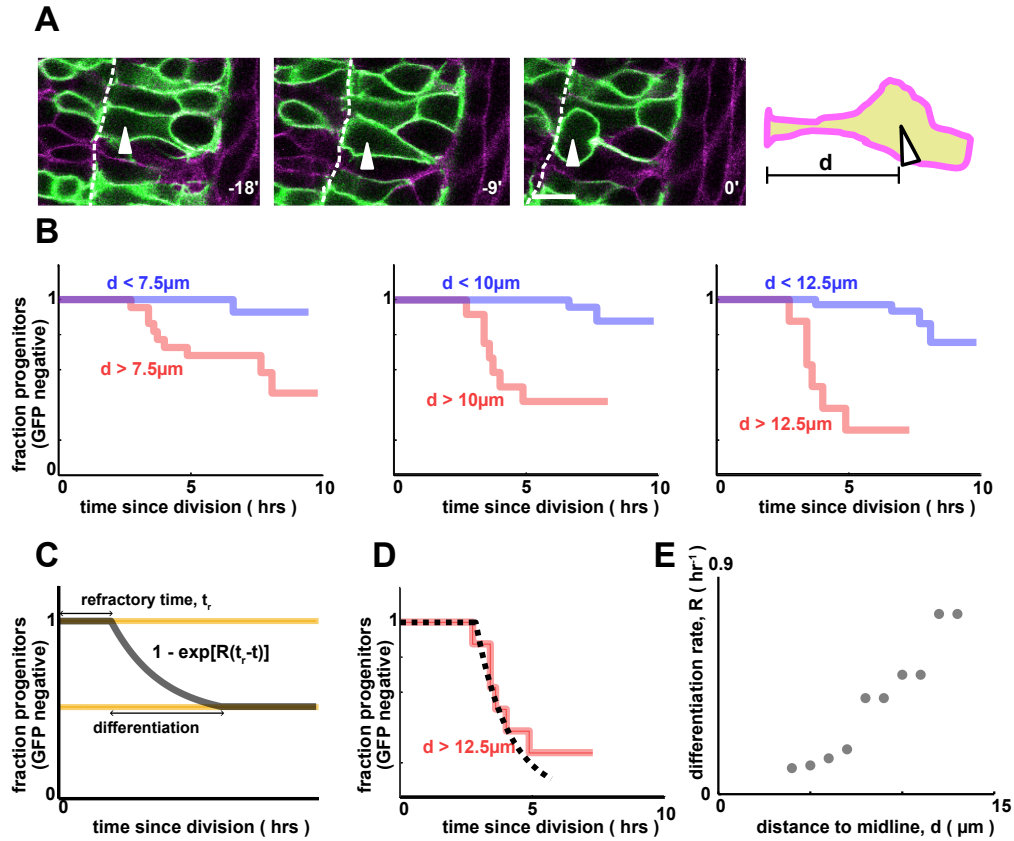

666

667 A: Quantification of pre-mitotic cell shape by distance to midline,  $d$ . (Scale bar:  
 668  $10\mu\text{m}$ )

669 B: Single cell tracking reveals that cells that are far from the apical surface pre-  
 670 division turn on *neurod* more rapidly than those that are close. The dependence  
 671 of differentiation rate on cell shape is independent of the threshold value that  
 672 defines which cells are ‘far’ and which cells are ‘close’ (Figure 6.4). (Left:  $p =$   
 673  $0.01$ ; middle:  $p = 1\text{e-}6$ ; right:  $p = 1\text{e-}7$ ;  $n = 58$ ).

674 C: A simple model for differentiation, where for some time window, each cell  
675 differentiates at a constant rate per unit time,  $R$ , which we call the differentiation  
676 rate.

677 D: Numerical fit of the model in (C) to the data in (B).

678 E: Differentiation rate,  $R$ , as a function of the distance to midline,  $d$ .

679

680 **Figure 3: Pushing progenitors away from the apical surface by an arrested**  
681 **mitotic cell promotes their differentiation**

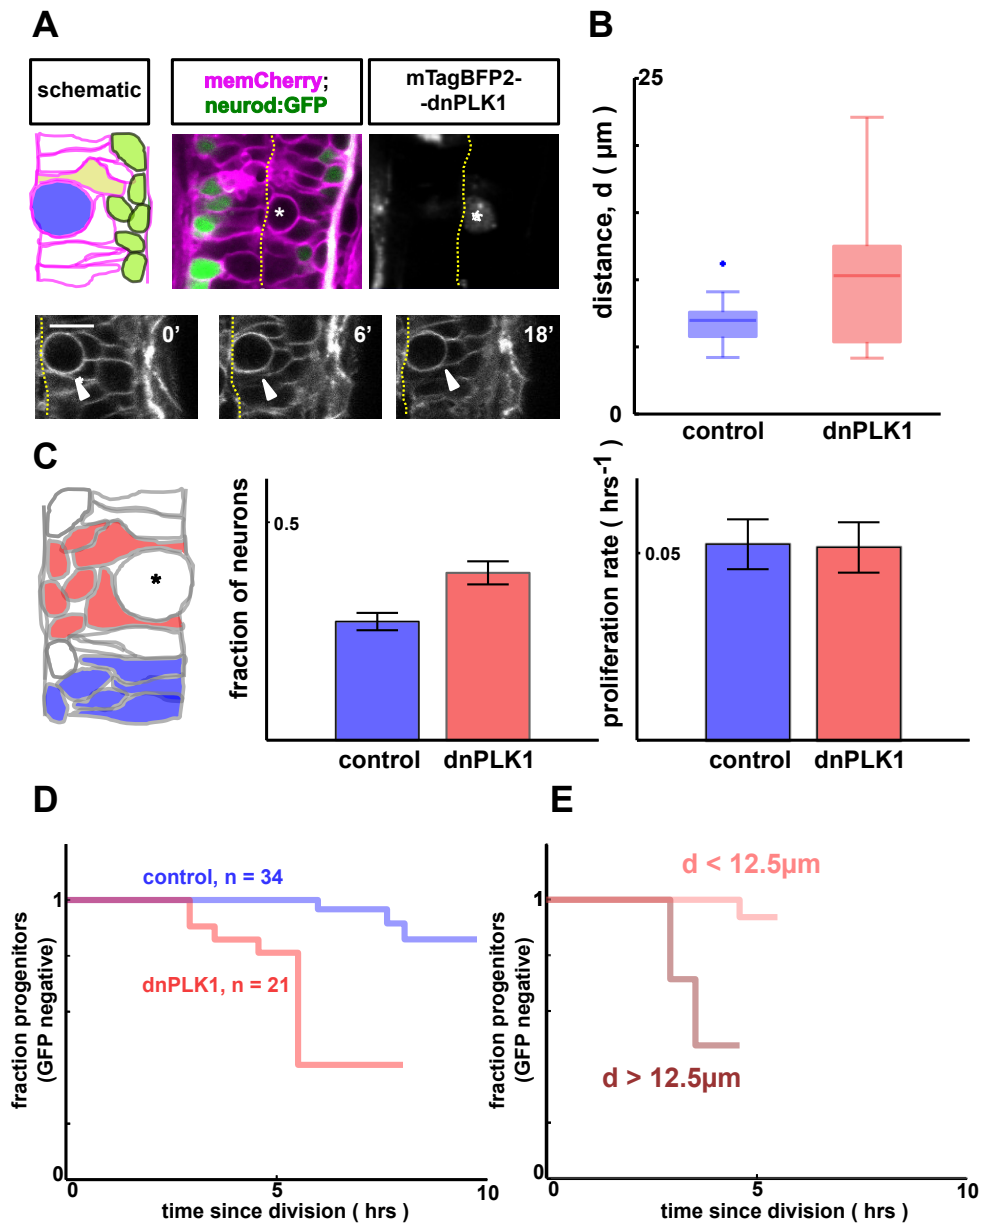

682

683 (A) Cell shapes are perturbed by inducibly and mosaically arresting neighbouring  
684 cells in mitosis, using a heat-shock inducible dnPLK1 construct, which prevents  
685 mitotic exit (lower). (Scale bar:  $10\mu\text{m}$ )

686 (B) Cells adjacent to the arrested mitotic cell are shifted basally ( $p < 0.01$ ,  $n = 10$   
687 for dnPLK1,  $n = 26$  for control). Here,  $d$  is the distance to the apical surface prior  
688 to division, as measured in Fig. 2.

689 (C) There is an increased fraction of neurons adjacent to arrested mitotic cells  
690 (red) than in control regions without an arrested cell (blue) ( $p < 0.01$ ).  
691 Proliferation rates are similar in the two cases (right) ( $p = 0.9$ ). ( $n = 7$  for both  
692 cases)

693 (D) Tracking of single cells adjacent to an arrested mitotic cell reveals a  
694 significant increase in differentiation ( $p < 0.01$ ), compared to control (data from  
695 the same experiment as Fig. 2).

696 (E) Single cell tracking reveals the same correlation between cell shape and  
697 *neurod* dynamics as in Fig. 2 for cells adjacent to arrested mitotic cells ( $p <$   
698  $0.001$ , using the  $n = 21$  tracked dnPLK1 cells).

699

700 **Figure 4: Progenitors adjacent to a non-apical mitotic cell do not**  
701 **differentiate more rapidly relative to control**

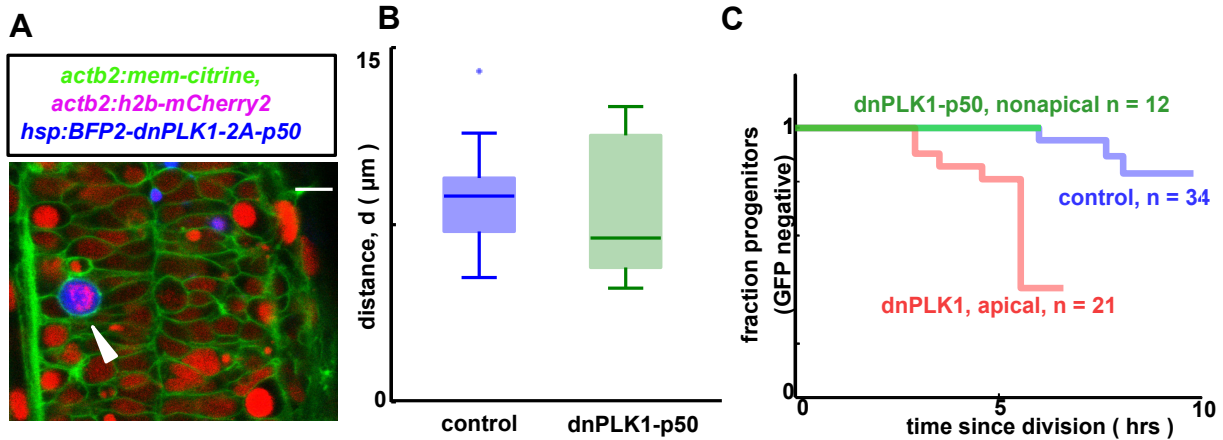

702

703 A: Arrested mitotic cells can be nonapical (arrowhead). h2b-mCherry  
704 demonstrates condensed chromosomes hence mitotic entry. Scale bar:  $10\mu\text{m}$ )

705 B: Progenitors are not pushed away from the apical surface adjacent to dnPLK1-  
706 p50 arrested non-apical mitotic cells prior to division ( $p = 0.6$ )

707 C: Non-apical mitotic cells do not induce differentiation of their neighbors ( $p =$   
708  $0.8$ ,  $n = 12$  vs. control, which is the same control data as in Fig. 3).

709

710 **Figure 5: Notch activity as a potential readout of nuclear position.**

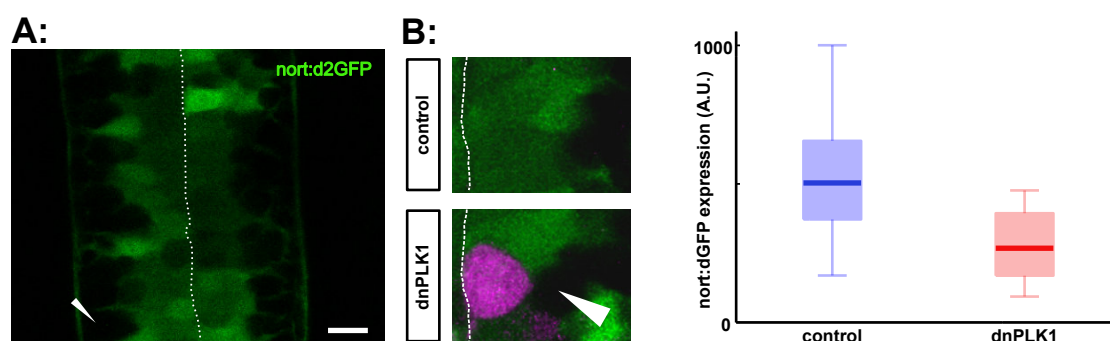

711

712 A: nort:d2GFP expression reports Notch activity in the neural tube. Arrowhead  
713 denotes GFP-negative, basally localized neurons. (Scale bar: 10 $\mu$ m)

714 B: Notch activity (green) is significantly inhibited in progenitors that are adjacent  
715 to an arrested mitotic cell (magenta) ( $p < 0.01$ ,  $n = 15$  for control,  $n = 12$  for  
716 dnPLK1). (Scale bar: 10 $\mu$ m)

717

718 **Figure 6: Apical crowding as a feedback mechanism to control progenitor**  
 719 **number**

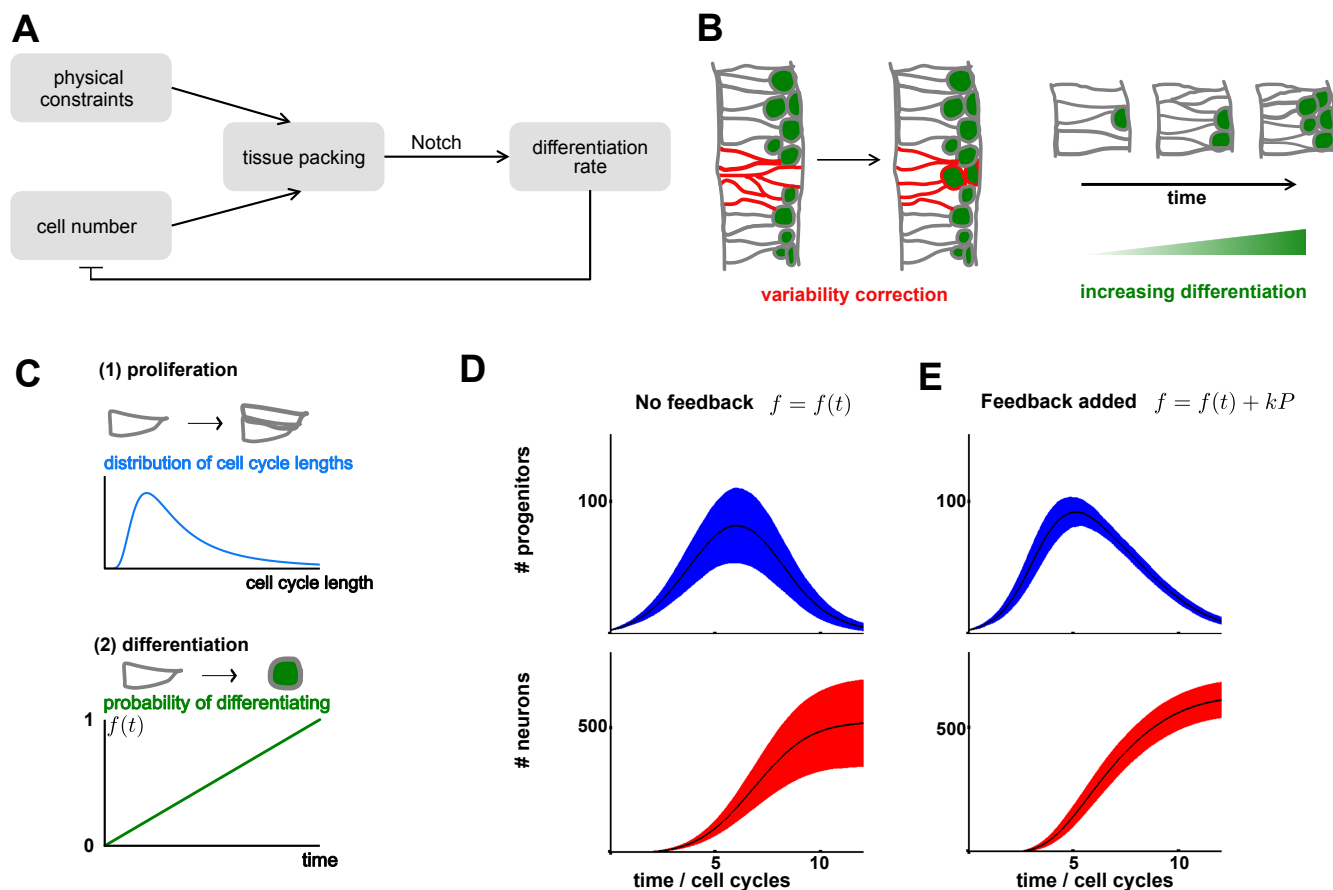

720

721 A: We hypothesize that the regulation of differentiation by cell shape forms a  
 722 negative feedback loop. We speculate that this feedback could perform several  
 723 functions, schematized in B.

724 B: Negative feedback naturally reduces variability in progenitor number. Left: a  
 725 region of high progenitor density (red) corrects itself by differentiating. Right: If  
 726 cells divide within a confined space, negative feedback predicts an increase in  
 727 differentiation over time.



728 C: An *in silico* model of neural tube development with two main ingredients.

729 Upper: progenitors proliferate with a given cell cycle distribution. Lower:

730 progenitors differentiate shortly after dividing, with probability  $f(t)$ .

731 D: Progenitor and neuron numbers are variable without feedback. The black line

732 is the mean trajectory; solid regions denote mean plus/minus standard deviation

733 for 3000 independent simulations.

734 E: When we add feedback (by allowing  $f(t) = f_0(t) + kP$ ), the standard

735 deviation in neuron and progenitor number is significantly reduced.

736

737 **Supplementary Figure Captions**

738 **Figure S1**

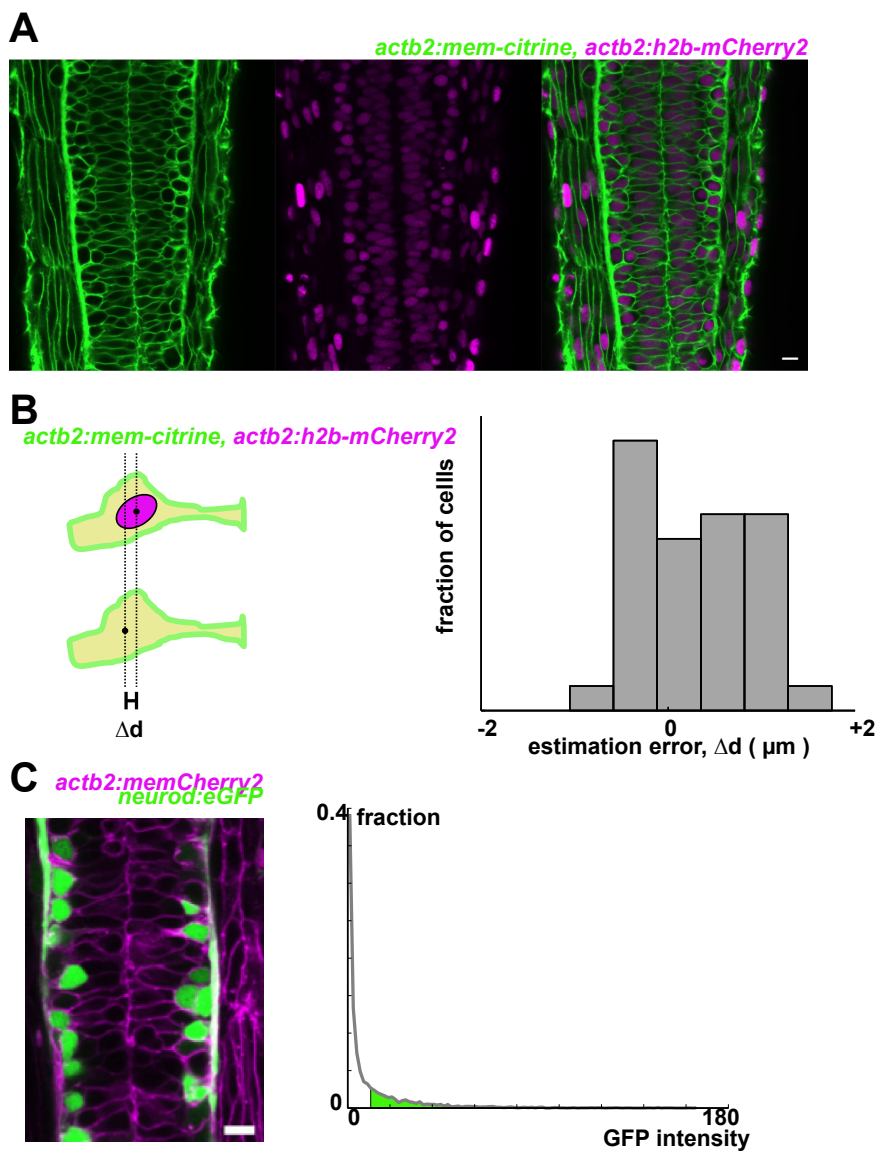

739

740 A: Embryos doubly transgenic for a membrane and nuclear label (mem-citrine  
741 and h2b-mCherry2) reveal the densely-packed pseudostratified epithelial  
742 character of the neural tube.

743 B: We compared nuclear position (based on h2b signal) with the cell centroid  
744 position (based on the citrine signal), both manually identified. We find that the  
745 difference between these two measurements is rather small (mean value  $< 1\mu\text{m}$ ).

746 C: *Tg(neurod:eGFP)* is used to classify neurons versus progenitors. Cells are  
747 segmented, and the median GFP intensity is calculated per cell (the median,  
748 rather than the mean, is robust to scatter of GFP signal from high intensity  
749 neighboring cells). Neurons are identified as having a median GFP intensity  
750 higher than a certain threshold, defined manually by referencing the raw images,  
751 and is fixed for all samples for the same experiment.

752

753

754 **Figure S2**

755

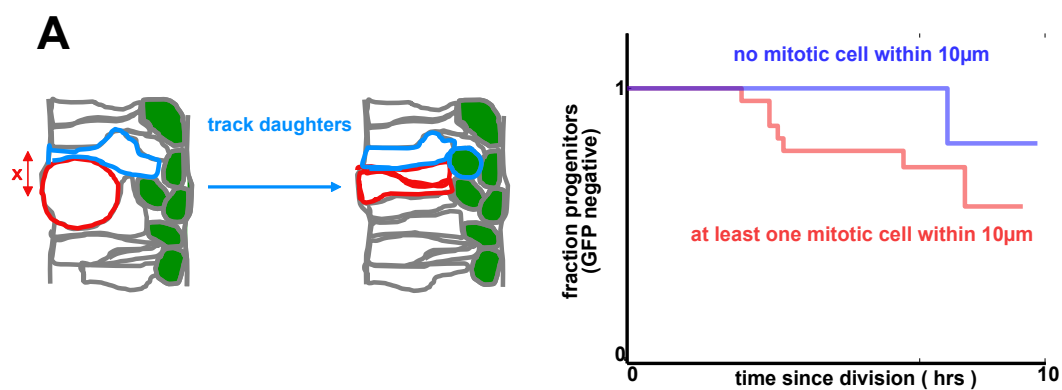

756

757

758

759 A: By tracking progenitors, we see a small, but not significant ( $p = 0.1$ ) difference  
760 in differentiation rate when comparing cells that are or are not adjacent to  
761 dividing cells ( $n=58$ , same movies as in Figure 2).

762

763

764 **Figure S3**

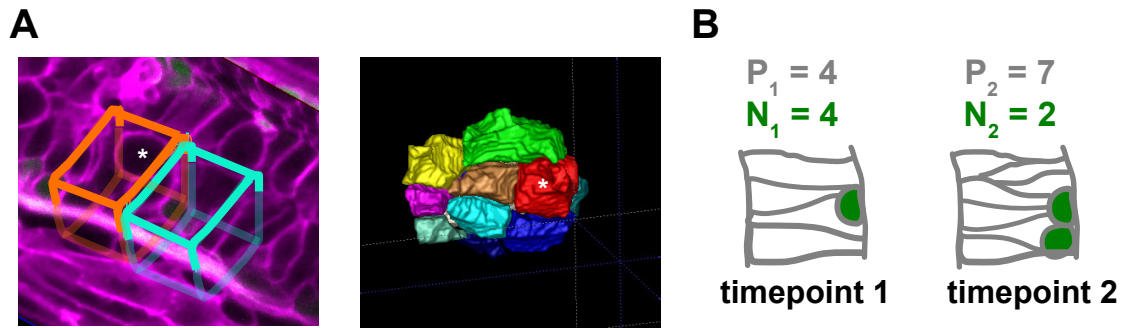

765

766 A: Left: We compare regions adjacent to a mitotic cell ( $15\mu\text{m} \times 15\mu\text{m}$  apical  
767 surface, manually contoured) [orange], to nearby control regions of the same  
768 dimensions but without an arrested cell [cyan]. Single cell tracking reveals that  
769 there is little movement of cells along AP/DV that would take them out of the  
770 regions ( $\sim 2.6\mu\text{m}$  mean distance moved). Right: segmented image. Asterisks  
771 depict an arrested mitotic cell.

772 B: Illustrative calculation. We define the fraction of neurons as  $f = N/(N + P)$ , i.e.  
773 for the right  $f = 2/(2 + 7) = 0.22$ . We define the proliferation rate between the  
774 two timepoints as:  $\mu = (P_2 + N_2 - P_1 - N_1)/2(P_1 + P_2)$ .

775

776

777 **Figure S4**

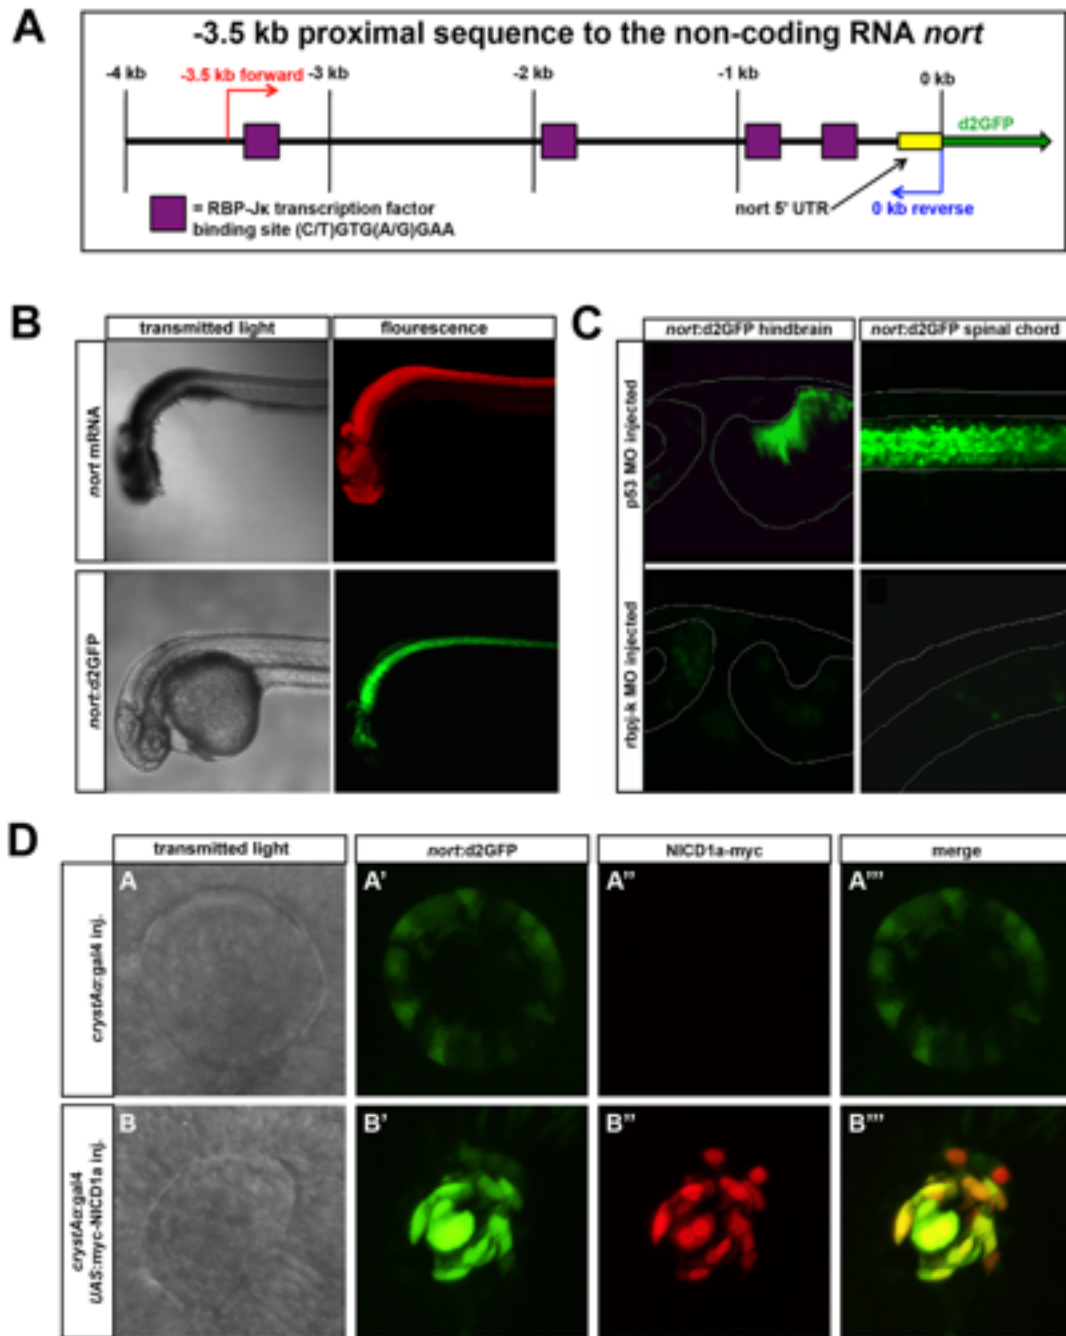

778

779 A: Schematic of the 3.5 kb *nort* proximal promoter. This region contains 4  
 780 canonical *rbpj-K* binding sites. B: *nort* mRNA (red) and *nort:d2GFP* (green)  
 781 transgene express in the same tissues at 30 hpf. C: *nort:d2GFP* expression was  
 782 reduced in a *rbpj-k* MO injected 48 hpf hindbrain and spinal cord compared to the

783 p53 MO injected controls. The morphology of the hindbrain was similar to the  
784 controls while the rbpj-k MO injected spinal cord was curved. D: Normal  
785 expression of *nort:d2GFP* is found in the lens epithelium. Overexpression of myc-  
786 NICD1a in the lens using *crystA*  $\alpha$ :gal4 causes enhanced ectopic *nort:d2GFP*  
787 expression. myc immunofluorescence co-localizes with upregulated d2GFP at 28  
788 hpf.  
789  
790  
791  
792

793 **Table S1: Primers used in this study**

794

| <b>Construct</b>           | <b>Part</b>          | <b>Primer sequence</b>                                           |
|----------------------------|----------------------|------------------------------------------------------------------|
| hsp:mTagBFP2-dnPLK1        | mTagBFP2             | TACAAGCTACTTGTCTTTTTGCAGGATC<br>CGCCACCATGAGCGAGCTGATTAAGGAGAAC  |
| hsp:mTagBFP2-dnPLK1        | mTagBFP2             | AGGTCCTCCTCGGAGATCAGCTTCTG<br>CTCCATATTAAGCTTGTGCCCCAGTTTGC      |
| hsp:mTagBFP2-dnPLK1        | dnPLK1               | CTCCCTAGCAAAGCTGGGACACAAGCTTAATA<br>TGGAGCAGAAGCTGATCTCCG        |
| hsp:mTagBFP2-dnPLK1        | dnPLK1               | CATCAATGTATCTTATCATGTCTGGATCACCGG<br>TTTAGGAGGCCTTGAGACGGTTG     |
| hsp:p50-2A-mTagBFP2-dnPLK1 | mTagBFP2-dnPLK1      | CAGGCTGGAGACGTGGAGGAGAACCTGGAC<br>CTATGAGCGAGCTGATTAAGGAGAAC     |
| hsp:p50-2A-mTagBFP2-dnPLK1 | mTagBFP2-dnPLK1      | CATCAATGTATCTTATCATGTCTGGATCACCGG<br>TTTAGGAGGCCTTGAGACGGTTG     |
| hsp:p50-2A-mTagBFP2-dnPLK1 | p50                  | AGTACAAGCTACTTGTCTTTTTGCAGGATCCG<br>CCACCATGGCCGACCCGAAGTACG     |
| hsp:p50-2A-mTagBFP2-dnPLK1 | p50                  | CTTCAGCAGGCTGAAGTTAGTAGCTCCGCTTCC<br>CTTGTTGAGTTTCTTCATCCTCTGGTC |
| hsp:p50-2A-mTagBFP2-dnPLK1 | P2A                  | GCGCTGGACCAGAGGATGAAGAACTCAACAAG<br>GGAAGCGGAGCTACTAACTTCAGC     |
| hsp:p50-2A-mTagBFP2-dnPLK1 | P2A                  | TCATGTGCATGTTCTCCTTAATCAGCTCGCTCA<br>TAGGTCCAGGGTTCTCCTCCAC      |
| nort:d2GFP                 | -3.5 kb nort forward | GGGGACAACCTTTGTATAGAAAAGTTGCTTGTGG<br>AGAGTCTGTCCTGCATT          |
| nort:d2GFP                 | -3.5 kb nort reverse | GGGGACTGTTTTTTGTACAACTTGGCCTGCA<br>GCTCCTCTATTTATACT             |
| nort in situ probe forward |                      | AGAGCCCCGAGATCTCCAGCAGATC                                        |
| nort in situ probe reverse |                      | GTTGATTGTTTTATTTTCGCAGCAGAAATACATTCAGTGGGC                       |

795

796

797

798

799

800

801

802

803

804

805

806



## 807 **References**

808

809 Aggarwal, V., Dickinson, R.B., Lele, T.P., 2016. Concentration Sensing by the  
810 Moving Nucleus in Cell Fate Determination: A Computational Analysis. PloS one  
811 11, e0149213.

812 Alexandre, P., Reugels, A.M., Barker, D., Blanc, E., Clarke, J.D., 2010. Neurons  
813 derive from the more apical daughter in asymmetric divisions in the zebrafish  
814 neural tube. Nature neuroscience 13, 673-679.

815 Alexiades, M.R., Cepko, C., 1996. Quantitative analysis of proliferation and cell  
816 cycle length during development of the rat retina. Developmental dynamics : an  
817 official publication of the American Association of Anatomists 205, 293-307.

818 Appel, B., Givan, L.A., Eisen, J.S., 2001. Delta-Notch signaling and lateral  
819 inhibition in zebrafish spinal cord development. BMC developmental biology 1,  
820 13.

821 Aragona, M., Panciera, T., Manfrin, A., Giulitti, S., Michielin, F., Elvassore, N.,  
822 Dupont, S., Piccolo, S., 2013. A mechanical checkpoint controls multicellular  
823 growth through YAP/TAZ regulation by actin-processing factors. Cell 154, 1047-  
824 1059.

825 Arulmoli, J., Pathak, M.M., McDonnell, L.P., Nourse, J.L., Tombola, F.,  
826 Earthman, J.C., Flanagan, L.A., 2015. Static stretch affects neural stem cell  
827 differentiation in an extracellular matrix-dependent manner. Scientific reports 5,  
828 8499.

829 Baye, L.M., Link, B.A., 2007. Interkinetic nuclear migration and the selection of  
830 neurogenic cell divisions during vertebrate retinogenesis. *The Journal of*  
831 *neuroscience : the official journal of the Society for Neuroscience* 27, 10143-  
832 10152.

833 Benham-Pyle, B.W., Pruitt, B.L., Nelson, W.J., 2015. Cell adhesion. Mechanical  
834 strain induces E-cadherin-dependent Yap1 and beta-catenin activation to drive  
835 cell cycle entry. *Science* 348, 1024-1027.

836 Bogdan, P., Deasy, B.M., Gharaibeh, B., Roehrs, T., Marculescu, R., 2014.  
837 Heterogeneous structure of stem cells dynamics: statistical models and  
838 quantitative predictions. *Scientific reports* 4, 4826.

839 Bort, R., Signore, M., Tremblay, K., Martinez Barbera, J.P., Zaret, K.S., 2006.  
840 Hex homeobox gene controls the transition of the endoderm to a  
841 pseudostratified, cell emergent epithelium for liver bud development.  
842 *Developmental biology* 290, 44-56.

843 Bray, S.J., 2016. Notch signalling in context. *Nature reviews. Molecular cell*  
844 *biology* 17, 722-735.

845 Brunet, T., Bouclet, A., Ahmadi, P., Mitrossilis, D., Driquez, B., Brunet, A.C.,  
846 Henry, L., Serman, F., Bealle, G., Menager, C., Dumas-Bouchiat, F., Givord, D.,  
847 Yanicostas, C., Le-Roy, D., Dempsey, N.M., Plessis, A., Farge, E., 2013.  
848 Evolutionary conservation of early mesoderm specification by  
849 mechanotransduction in Bilateria. *Nature communications* 4, 2821.

850 Burkhardt, J.K., Echeverri, C.J., Nilsson, T., Vallee, R.B., 1997. Overexpression  
851 of the dynamitin (p50) subunit of the dynein complex disrupts dynein-

852 dependent maintenance of membrane organelle distribution. *The Journal of cell*  
853 *biology* 139, 469-484.

854 Clark, B.S., Cui, S., Miesfeld, J.B., Klezovitch, O., Vasioukhin, V., Link, B.A.,  
855 2012. Loss of Lgl1 in retinal neuroepithelia reveals links between apical domain  
856 size, Notch activity and neurogenesis. *Development* 139, 1599-1610.

857 Copp, A.J., Stanier, P., Greene, N.D., 2013. Neural tube defects: recent  
858 advances, unsolved questions, and controversies. *The Lancet. Neurology* 12,  
859 799-810.

860 Coste, B., Xiao, B., Santos, J.S., Syeda, R., Grandl, J., Spencer, K.S., Kim, S.E.,  
861 Schmidt, M., Mathur, J., Dubin, A.E., Montal, M., Patapoutian, A., 2012. Piezo  
862 proteins are pore-forming subunits of mechanically activated channels. *Nature*  
863 483, 176-181.

864 Del Bene, F., Wehman, A.M., Link, B.A., Baier, H., 2008. Regulation of  
865 neurogenesis by interkinetic nuclear migration through an apical-basal notch  
866 gradient. *Cell* 134, 1055-1065.

867 Dessaud, E., Yang, L.L., Hill, K., Cox, B., Ulloa, F., Ribeiro, A., Mynett, A.,  
868 Novitch, B.G., Briscoe, J., 2007. Interpretation of the sonic hedgehog morphogen  
869 gradient by a temporal adaptation mechanism. *Nature* 450, 717-720.

870 Dong, Z., Yang, N., Yeo, S.Y., Chitnis, A., Guo, S., 2012. Intralineaage directional  
871 Notch signaling regulates self-renewal and differentiation of asymmetrically  
872 dividing radial glia. *Neuron* 74, 65-78.

- 873 Dupont, S., Morsut, L., Aragona, M., Enzo, E., Giulitti, S., Cordenonsi, M.,  
874 Zanconato, F., Le Digabel, J., Forcato, M., Bicciato, S., Elvassore, N., Piccolo,  
875 S., 2011. Role of YAP/TAZ in mechanotransduction. *Nature* 474, 179-183.
- 876 Engler, A.J., Sen, S., Sweeney, H.L., Discher, D.E., 2006. Matrix elasticity directs  
877 stem cell lineage specification. *Cell* 126, 677-689.
- 878 Fernandez-Sanchez, M.E., Barbier, S., Whitehead, J., Bealle, G., Michel, A.,  
879 Latorre-Ossa, H., Rey, C., Fouassier, L., Claperon, A., Brulle, L., Girard, E.,  
880 Servant, N., Rio-Frio, T., Marie, H., Lesieur, S., Housset, C., Gennisson, J.L.,  
881 Tanter, M., Menager, C., Fre, S., Robine, S., Farge, E., 2015. Mechanical  
882 induction of the tumorigenic beta-catenin pathway by tumour growth pressure.  
883 *Nature* 523, 92-95.
- 884 Garcia-Campmany, L., Marti, E., 2007. The TGFbeta intracellular effector Smad3  
885 regulates neuronal differentiation and cell fate specification in the developing  
886 spinal cord. *Development* 134, 65-75.
- 887 Gilbert, P.M., Havenstrite, K.L., Magnusson, K.E., Sacco, A., Leonardi, N.A.,  
888 Kraft, P., Nguyen, N.K., Thrun, S., Lutolf, M.P., Blau, H.M., 2010. Substrate  
889 elasticity regulates skeletal muscle stem cell self-renewal in culture. *Science* 329,  
890 1078-1081.
- 891 Gordon, W.R., Zimmerman, B., He, L., Miles, L.J., Huang, J., Tiyanont, K.,  
892 McArthur, D.G., Aster, J.C., Perrimon, N., Loparo, J.J., Blacklow, S.C., 2015.  
893 Mechanical Allostery: Evidence for a Force Requirement in the Proteolytic  
894 Activation of Notch. *Developmental cell* 33, 729-736.

- 895 Grosse, A.S., Pressprich, M.F., Curley, L.B., Hamilton, K.L., Margolis, B.,  
896 Hildebrand, J.D., Gumucio, D.L., 2011. Cell dynamics in fetal intestinal  
897 epithelium: implications for intestinal growth and morphogenesis. *Development*  
898 138, 4423-4432.
- 899 Hardwick, L.J., Ali, F.R., Azzarelli, R., Philpott, A., 2015. Cell cycle regulation of  
900 proliferation versus differentiation in the central nervous system. *Cell and tissue*  
901 *research* 359, 187-200.
- 902 Hardwick, L.J., Philpott, A., 2014. Nervous decision-making: to divide or  
903 differentiate. *Trends in genetics : TIG* 30, 254-261.
- 904 Hatakeyama, J., Wakamatsu, Y., Nagafuchi, A., Kageyama, R., Shigemoto, R.,  
905 Shimamura, K., 2014. Cadherin-based adhesions in the apical endfoot are  
906 required for active Notch signaling to control neurogenesis in vertebrates.  
907 *Development* 141, 1671-1682.
- 908 Hayes, J.M., Hartsock, A., Clark, B.S., Napier, H.R., Link, B.A., Gross, J.M.,  
909 2012. Integrin alpha5/fibronectin1 and focal adhesion kinase are required for lens  
910 fiber morphogenesis in zebrafish. *Molecular biology of the cell* 23, 4725-4738.
- 911 He, J., Zhang, G., Almeida, A.D., Cayouette, M., Simons, B.D., Harris, W.A.,  
912 2012. How variable clones build an invariant retina. *Neuron* 75, 786-798.
- 913 Hindley, C., Philpott, A., 2012. Co-ordination of cell cycle and differentiation in  
914 the developing nervous system. *The Biochemical journal* 444, 375-382.

915 Huang, P., Xiong, F., Megason, S.G., Schier, A.F., 2012. Attenuation of Notch  
916 and Hedgehog signaling is required for fate specification in the spinal cord. PLoS  
917 genetics 8, e1002762.

918 Hudish, L.I., Galati, D.F., Ravanelli, A.M., Pearson, C.G., Huang, P., Appel, B.,  
919 2016. miR-219 regulates neural progenitors by dampening apical Par protein-  
920 dependent Hedgehog signaling. Development 143, 2292-2304.

921 Huttner, W.B., Kosodo, Y., 2005. Symmetric versus asymmetric cell division  
922 during neurogenesis in the developing vertebrate central nervous system.  
923 Current opinion in cell biology 17, 648-657.

924 Jinguji, Y., Ishikawa, H., 1992. Electron microscopic observations on the  
925 maintenance of the tight junction during cell division in the epithelium of the  
926 mouse small intestine. Cell structure and function 17, 27-37.

927 Kicheva, A., Bollenbach, T., Ribeiro, A., Valle, H.P., Lovell-Badge, R., Episkopou,  
928 V., Briscoe, J., 2014. Coordination of progenitor specification and growth in  
929 mouse and chick spinal cord. Science 345, 1254927.

930 Kosodo, Y., Suetsugu, T., Suda, M., Mimori-Kiyosue, Y., Toida, K., Baba, S.A.,  
931 Kimura, A., Matsuzaki, F., 2011. Regulation of interkinetic nuclear migration by  
932 cell cycle-coupled active and passive mechanisms in the developing brain. The  
933 EMBO journal 30, 1690-1704.

934 Kwan, K.M., Fujimoto, E., Grabher, C., Mangum, B.D., Hardy, M.E., Campbell,  
935 D.S., Parant, J.M., Yost, H.J., Kanki, J.P., Chien, C.B., 2007. The Tol2kit: a  
936 multisite gateway-based construction kit for Tol2 transposon transgenesis  
937 constructs. Dev Dyn 236, 3088-3099.

- 938 Latasa, M.J., Cisneros, E., Frade, J.M., 2009. Cell cycle control of Notch  
939 signaling and the functional regionalization of the neuroepithelium during  
940 vertebrate neurogenesis. *The International journal of developmental biology* 53,  
941 895-908.
- 942 Le Dreau, G., Saade, M., Gutierrez-Vallejo, I., Marti, E., 2014. The strength of  
943 SMAD1/5 activity determines the mode of stem cell division in the developing  
944 spinal cord. *The Journal of cell biology* 204, 591-605.
- 945 Lee, J.E., 1997. Basic helix-loop-helix genes in neural development. *Current*  
946 *opinion in neurobiology* 7, 13-20.
- 947 Leipzig, N.D., Shoichet, M.S., 2009. The effect of substrate stiffness on adult  
948 neural stem cell behavior. *Biomaterials* 30, 6867-6878.
- 949 Leung, L., Klopper, A.V., Grill, S.W., Harris, W.A., Norden, C., 2011. Apical  
950 migration of nuclei during G2 is a prerequisite for all nuclear motion in zebrafish  
951 neuroepithelia. *Development* 138, 5003-5013.
- 952 Megason, S.G., 2009. In toto imaging of embryogenesis with confocal time-lapse  
953 microscopy. *Methods in molecular biology* 546, 317-332.
- 954 Miguez, D.G., 2015. A Branching Process to Characterize the Dynamics of Stem  
955 Cell Differentiation. *Scientific reports* 5, 13265.
- 956 Mosaliganti, K.R., Noche, R.R., Xiong, F., Swinburne, I.A., Megason, S.G., 2012.  
957 ACME: automated cell morphology extractor for comprehensive reconstruction of  
958 cell membranes. *PLoS computational biology* 8, e1002780.

959 Noctor, S.C., Martinez-Cerdeno, V., Ivic, L., Kriegstein, A.R., 2004. Cortical  
960 neurons arise in symmetric and asymmetric division zones and migrate through  
961 specific phases. *Nature neuroscience* 7, 136-144.

962 Norden, C., Young, S., Link, B.A., Harris, W.A., 2009. Actomyosin is the main  
963 driver of interkinetic nuclear migration in the retina. *Cell* 138, 1195-1208.

964 Nowell, C.S., Odermatt, P.D., Azzolin, L., Hohnel, S., Wagner, E.F., Fantner,  
965 G.E., Lutolf, M.P., Barrandon, Y., Piccolo, S., Radtke, F., 2016. Chronic  
966 inflammation imposes aberrant cell fate in regenerating epithelia through  
967 mechanotransduction. *Nature cell biology* 18, 168-180.

968 Obholzer, N., Wolfson, S., Trapani, J.G., Mo, W., Nechiporuk, A., Busch-  
969 Nentwich, E., Seiler, C., Sidi, S., Sollner, C., Duncan, R.N., Boehland, A.,  
970 Nicolson, T., 2008. Vesicular glutamate transporter 3 is required for synaptic  
971 transmission in zebrafish hair cells. *The Journal of neuroscience : the official*  
972 *journal of the Society for Neuroscience* 28, 2110-2118.

973 Ohata, S., Aoki, R., Kinoshita, S., Yamaguchi, M., Tsuruoka-Kinoshita, S.,  
974 Tanaka, H., Wada, H., Watabe, S., Tsuboi, T., Masai, I., Okamoto, H., 2011.  
975 Dual roles of Notch in regulation of apically restricted mitosis and apicobasal  
976 polarity of neuroepithelial cells. *Neuron* 69, 215-230.

977 Otani, T., Marchetto, M.C., Gage, F.H., Simons, B.D., Livesey, F.J., 2016. 2D  
978 and 3D Stem Cell Models of Primate Cortical Development Identify Species-  
979 Specific Differences in Progenitor Behavior Contributing to Brain Size. *Cell stem*  
980 *cell* 18, 467-480.



- 981 Ou, G., Weaver, V.M., 2015. Tumor-induced solid stress activates beta-catenin  
982 signaling to drive malignant behavior in normal, tumor-adjacent cells. *BioEssays* :  
983 news and reviews in molecular, cellular and developmental biology 37, 1293-  
984 1297.
- 985 Pan, Y., Heemskerk, I., Ibar, C., Shraiman, B.I., Irvine, K.D., 2016. Differential  
986 growth triggers mechanical feedback that elevates Hippo signaling. *Proceedings*  
987 *of the National Academy of Sciences of the United States of America*.
- 988 Paolini, A., Duchemin, A.L., Albadri, S., Patzel, E., Bornhorst, D., Gonzalez  
989 Avalos, P., Lemke, S., Machate, A., Brand, M., Sel, S., Di Donato, V., Del Bene,  
990 F., Zolessi, F.R., Ramialison, M., Poggi, L., 2015. Asymmetric inheritance of the  
991 apical domain and self-renewal of retinal ganglion cell progenitors depend on  
992 Anillin function. *Development* 142, 832-839.
- 993 Rich, J.T., Neely, J.G., Paniello, R.C., Voelker, C.C., Nussenbaum, B., Wang,  
994 E.W., 2010. A practical guide to understanding Kaplan-Meier curves.  
995 *Otolaryngology--head and neck surgery : official journal of American Academy of*  
996 *Otolaryngology-Head and Neck Surgery* 143, 331-336.
- 997 Robu, M.E., Larson, J.D., Nasevicius, A., Beiraghi, S., Brenner, C., Farber, S.A.,  
998 Ekker, S.C., 2007. p53 activation by knockdown technologies. *PLoS Genet* 3,  
999 e78.
- 1000 Saade, M., Gutierrez-Vallejo, I., Le Dreau, G., Rabadan, M.A., Miguez, D.G.,  
1001 Buceta, J., Marti, E., 2013. Sonic hedgehog signaling switches the mode of  
1002 division in the developing nervous system. *Cell reports* 4, 492-503.

- 1003 Scheer, N., Campos-Ortega, J.A., 1999. Use of the Gal4-UAS technique for  
1004 targeted gene expression in the zebrafish. *Mechanisms of development* 80, 153-  
1005 158.
- 1006 Schier, A.F., Neuhauss, S.C., Harvey, M., Malicki, J., Solnica-Krezel, L., Stainier,  
1007 D.Y., Zwartkruis, F., Abdelilah, S., Stemple, D.L., Rangini, Z., Yang, H., Driever,  
1008 W., 1996. Mutations affecting the development of the embryonic zebrafish brain.  
1009 *Development* 123, 165-178.
- 1010 Seidlits, S.K., Khaing, Z.Z., Petersen, R.R., Nickels, J.D., Vanscoy, J.E., Shear,  
1011 J.B., Schmidt, C.E., 2010. The effects of hyaluronic acid hydrogels with tunable  
1012 mechanical properties on neural progenitor cell differentiation. *Biomaterials* 31,  
1013 3930-3940.
- 1014 Shaya, O., Binshtok, U., Hersch, M., Rivkin, D., Weinreb, S., Amir-Zilberstein, L.,  
1015 Khamaisi, B., Oppenheim, O., Desai, R.A., Goodyear, R.J., Richardson, G.P.,  
1016 Chen, C.S., Sprinzak, D., 2017. Cell-Cell Contact Area Affects Notch Signaling  
1017 and Notch-Dependent Patterning. *Developmental cell* 40, 505-511 e506.
- 1018 Shraiman, B.I., 2005. Mechanical feedback as a possible regulator of tissue  
1019 growth. *Proceedings of the National Academy of Sciences of the United States of*  
1020 *America* 102, 3318-3323.
- 1021 Spear, P.C., Erickson, C.A., 2012. Interkinetic nuclear migration: a mysterious  
1022 process in search of a function. *Development, growth & differentiation* 54, 306-  
1023 316.

- 1024 Streichan, S.J., Hoerner, C.R., Schneidt, T., Holzer, D., Hufnagel, L., 2014.  
1025 Spatial constraints control cell proliferation in tissues. Proceedings of the  
1026 National Academy of Sciences of the United States of America 111, 5586-5591.
- 1027 Strzyz, P.J., Lee, H.O., Sidhaye, J., Weber, I.P., Leung, L.C., Norden, C., 2015.  
1028 Interkinetic nuclear migration is centrosome independent and ensures apical cell  
1029 division to maintain tissue integrity. Developmental cell 32, 203-219.
- 1030 Swinburne, I.A., Mosaliganti, K.R., Green, A.A., Megason, S.G., 2015. Improved  
1031 Long-Term Imaging of Embryos with Genetically Encoded alpha-Bungarotoxin.  
1032 PloS one 10, e0134005.
- 1033 Tallinen, T., Chung, J.Y., Biggins, J.S., Mahadevan, L., 2014. Gyrification from  
1034 constrained cortical expansion. Proceedings of the National Academy of  
1035 Sciences of the United States of America 111, 12667-12672.
- 1036 Tsuda, S., Kitagawa, T., Takashima, S., Asakawa, S., Shimizu, N., Mitani, H.,  
1037 Shima, A., Tsutsumi, M., Hori, H., Naruse, K., Ishikawa, Y., Takeda, H., 2010.  
1038 FAK-mediated extracellular signals are essential for interkinetic nuclear migration  
1039 and planar divisions in the neuroepithelium. Journal of cell science 123, 484-496.
- 1040 Tsujikawa, M., Omori, Y., Biyanwila, J., Malicki, J., 2007. Mechanism of  
1041 positioning the cell nucleus in vertebrate photoreceptors. Proceedings of the  
1042 National Academy of Sciences of the United States of America 104, 14819-  
1043 14824.
- 1044 Tsutsumi, M., Itoh, M., 2007. Novel transcript nort is a downstream target gene of  
1045 the Notch signaling pathway in zebrafish. Gene expression patterns : GEP 7,  
1046 227-232.

1047 Xiong, F., Ma, W., Hiscock, T.W., Mosaliganti, K.R., Tentner, A.R., Brakke, K.A.,  
1048 Rannou, N., Gelas, A., Souhait, L., Swinburne, I.A., Obholzer, N.D., Megason,  
1049 S.G., 2014. Interplay of cell shape and division orientation promotes robust  
1050 morphogenesis of developing epithelia. *Cell* 159, 415-427.

1051 Xiong, F., Obholzer, N.D., Noche, R.R., Megason, S.G., 2015. Multibow: digital  
1052 spectral barcodes for cell tracing. *PloS one* 10, e0127822.

1053 Xiong, F., Tentner, A.R., Huang, P., Gelas, A., Mosaliganti, K.R., Souhait, L.,  
1054 Rannou, N., Swinburne, I.A., Obholzer, N.D., Cowgill, P.D., Schier, A.F.,  
1055 Megason, S.G., 2013. Specified neural progenitors sort to form sharp domains  
1056 after noisy Shh signaling. *Cell* 153, 550-561.

1057 Yeo, S.Y., Chitnis, A.B., 2007. Jagged-mediated Notch signaling maintains  
1058 proliferating neural progenitors and regulates cell diversity in the ventral spinal  
1059 cord. *Proceedings of the National Academy of Sciences of the United States of*  
1060 *America* 104, 5913-5918.

1061 You, H., Sim, K.B., Wang, K.C., Kim, D.G., Kim, H.J., 1994. Morphological study  
1062 of surgically induced open neural tube defects in chick embryos--postoperative  
1063 24 hours. *Journal of Korean medical science* 9, 116-122.

1064 Zechner, D., Fujita, Y., Hulsken, J., Muller, T., Walther, I., Taketo, M.M.,  
1065 Crenshaw, E.B., 3rd, Birchmeier, W., Birchmeier, C., 2003. beta-Catenin signals  
1066 regulate cell growth and the balance between progenitor cell expansion and  
1067 differentiation in the nervous system. *Developmental biology* 258, 406-418.

1068

1069

1070
